# Supplementary material for: An improved automated radiosynthesis of [18F]FET-βAG-TOCA
Source: Royal Society of Chemistry journal article supplement (doi:10.1039/c8re00279g), 2018-12-11
Supplement: c8re00279g1.pdf [file c8re00279g1.pdf]

## Supporting Information

### **An Improved Automated Radiosynthesis of [ $^{18}\text{F}$ ]FET- $\beta$ AG-TOCA**

Louis Allott<sup>†</sup>, Chris Barnes<sup>†</sup>, Diana Brickute and Eric O. Aboagye\*

Comprehensive Cancer Imaging Centre, Imperial College London, Hammersmith Hospital,  
Du Cane Road, London, W12 0NN, UK

<sup>†</sup>Equal contribution

### **Contents**

|                                             |               |
|---------------------------------------------|---------------|
| <b>1. Photograph of FASTlab™ setup.....</b> | <b>Page 2</b> |
|---------------------------------------------|---------------|

## 1. Photograph of FASTlab™ setup

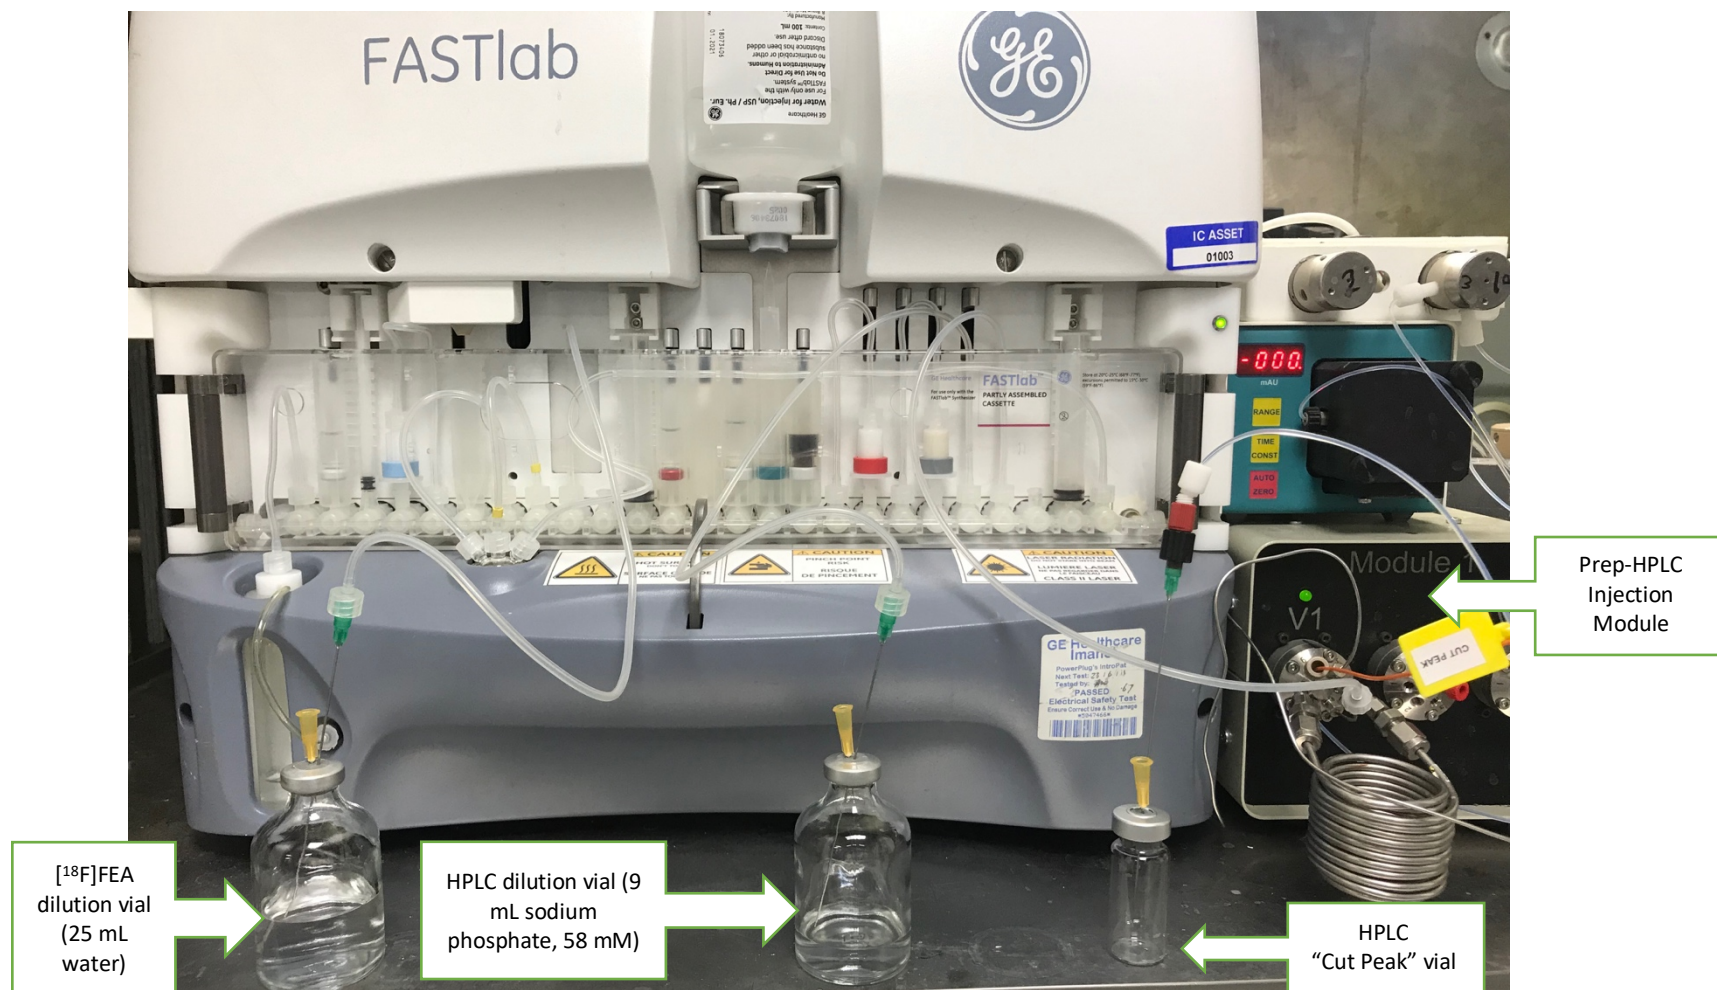

**Figure 1.** Photograph of FASTlab™ setup.
